# Supplementary material for: Molars to Medicine: A Focused Review on the Pre-Clinical Investigation and Treatment of Secondary Degeneration following Spinal Cord Injury Using Dental Stem Cells
Source: MDPI journal article supplement (doi:10.3390/cells13100817), 2024-05-10
Supplement: s1 [file s1]

**Supplementary Table S1.** English search strategies for focused review.

| <b>PubMed 29.02.2024</b>                                                                                                                                                                                                                                                                                                                                                                                                                                                                                                                                                                                                                                                                                                                                                                                                                                                                                     |                |
|--------------------------------------------------------------------------------------------------------------------------------------------------------------------------------------------------------------------------------------------------------------------------------------------------------------------------------------------------------------------------------------------------------------------------------------------------------------------------------------------------------------------------------------------------------------------------------------------------------------------------------------------------------------------------------------------------------------------------------------------------------------------------------------------------------------------------------------------------------------------------------------------------------------|----------------|
| <b>Search strategies</b>                                                                                                                                                                                                                                                                                                                                                                                                                                                                                                                                                                                                                                                                                                                                                                                                                                                                                     | <b>Results</b> |
| #1: "dental pulp stem cell"[Title/Abstract] OR "stem cell from human exfoliated deciduous teeth"[Title/Abstract] OR "human exfoliated deciduous teeth"[Title/Abstract] OR "exfoliated deciduous teeth"[Title/Abstract] OR "dental stem cell"[Title/Abstract] OR "dental pulp cell"[Title/Abstract] OR "dental pulp stem cell"[Title/Abstract] OR "dental pulp stem cell"[Title/Abstract] OR "human dental pulp stem cell"[Title/Abstract] OR "human dental pulp"[Title/Abstract] OR "DPSC"[Title/Abstract] OR "HDPC"[Title/Abstract] OR "dental follicle stem cell"[Title/Abstract] OR "dental follicle progenitor cell"[Title/Abstract] OR "DFPC"[Title/Abstract] OR "DFSC"[Title/Abstract] OR "stem cells from apical papilla"[Title/Abstract] OR "stem cell from apical papilla"[Title/Abstract] OR "SCAP"[Title/Abstract] OR "periodontal ligament stem cell"[Title/Abstract] OR "PDLSC"[Title/Abstract] | 8,676          |
| #2: "spinal cord injury"[Title/Abstract] OR "spinal injury"[Title/Abstract] OR "spinal cord trauma"[Title/Abstract] OR "spinal cord transection"[Title/Abstract] OR "spinal cord laceration"[Title/Abstract] OR "post traumatic myelopathy"[Title/Abstract] OR "spinal cord contusion"[Title/Abstract] OR "spinal cord hemi-contusion"[Title/Abstract] OR "spinal cord hemi-section"[Title/Abstract]                                                                                                                                                                                                                                                                                                                                                                                                                                                                                                         | 49,092         |
| #3: #1 AND #2                                                                                                                                                                                                                                                                                                                                                                                                                                                                                                                                                                                                                                                                                                                                                                                                                                                                                                | 62             |
| #4: #3 NOT Review [sb]                                                                                                                                                                                                                                                                                                                                                                                                                                                                                                                                                                                                                                                                                                                                                                                                                                                                                       | 50             |
